# Supplementary material for: Transcriptome Analysis of the Influence of High-Pressure Carbon Dioxide on Saccharomyces cerevisiae under Sub-Lethal Condition
Source: MDPI journal article supplement (doi:10.3390/jof8101011), 2022-09-27
Supplement: s1 [file s1]

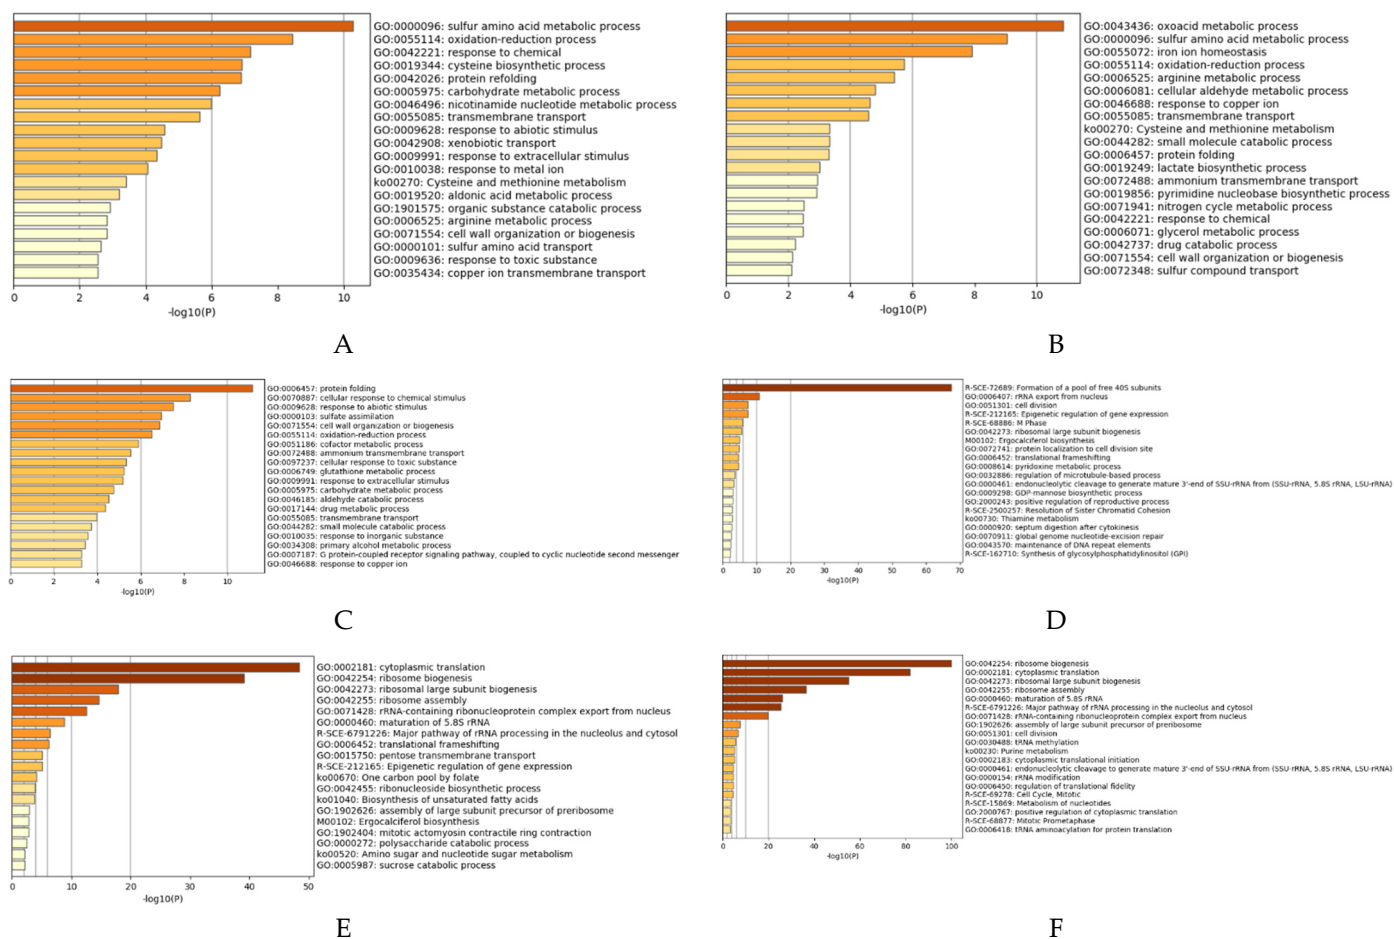

**Figure S1.** Gene ontology (GO) analysis of the identified DEGs. A and D are after 1-h treatment, B and E are after 2 h of treatment, and C and F are after 4 h of treatment. A to C indicate up-regulated genes, and D to F indicate down-regulated genes.
